# Supplementary material for: Compositional Analysis of Cutin in Maize Leaves
Source: HighWire-hosted journal article supplement (doi:10.1101/pdb.prot108434), 2024-08-12
Supplement: Supplemental_Table_1-AMM.xlsx [file Supplemental_Table_1-AMM.xlsx]

## Sheet: Instructions
	INSTRUCTIONS TO COMPLETE THE TEMPLATE SPREADSHEETS
	For each monomer (columns A-C), add the area values to the corresponding column for every replicate sample in the Excel template (columns D-H). Add the areas of the internal standards (IS) to the IS columns (P-T). For those monomers without alcohol groups,use 17:0 FAME (IS1) as IS for quantification. For hydroxylated monomers, including hydroxycinnamic acids, hydroxy acids, and use 15:0 15-hydrox…

## Sheet: Table legend
Supplemental Table 1. Chromatographic data analysis template. Results shown correspond to the representative analysis of juvenile and adult leaf cutin described in the protocol. Numbers of each component correspond to the peak numbers reported in Figure 3 of the manuscript.

## Sheet: Juvenile leaf
Juvenile leaf cutin
			Peak Area (PACOI)						Corrected Peak Area (CPACOI)						ISTD Peak Area (PAIS)						Corrected ISTD Peak Area (CPAIS)						MW + TMS		Constituent Mass (ug)						umol						MW - TMS		Corrected constituent mass (- TMS) [ug]						dry weight [mg]
			Juv 1	Juv 2	Juv 3	Juv 4	Juv 5		Juv 1	Juv 2	Juv 3	Juv 4	Juv 5		Juv 1	Juv 2	Juv 3	Juv 4	Juv 5		Juv 1	Juv 2	Juv 3	Juv 4	Juv 5				Juv 1	Juv 2	Juv 3	Juv 4	Juv 5		Juv 1	Juv 2	Juv 3	Juv 4	Juv 5				Juv 1	Juv 2	Juv 3	Juv 4	Juv 5		Juv 1
Hydroxycinnamic acid methyl esters
		1. Coumarate-cis	0.1571	0.1616	0.1777	0.1711	0.1038		0.368779	0.379343	0.417136	0.401643	0.243662		0.9127	0.938	1.0617	0.9324	0.9218		1.45358	1.49387	1.69087	1.48495	1.46807		250		6.34262	6.34833	6.16746	6.7619	4.14936		0.0253705	0.0253933	0.0246698	0.0270476	0.0165975		178		4.51595	4.52001	4.39123	4.81447	2.95435		49.1
		2. Coumarate-cis (no TMSi)	0.1502	0.1792	0.1546	0.1962	0.1198		0.352582	0.420657	0.362911	0.460563	0.281221		0.9127	0.938	1.0617	0.9324	0.9218		1.45358	1.49387	1.69087	1.48495	1.46807		178		6.06405	7.03973	5.36573	7.75385	4.78896		0.0340677	0.0395491	0.0301445	0.043561	0.0269043		178		6.06405	7.03973	5.36573	7.75385	4.78896		49.1
		3. Coumarate-trans	0.5084	0.4429	0.6988	0.5617	0.6195		1.19343	1.03967	1.64038	1.31854	1.45423		0.9127	0.938	1.0617	0.9324	0.9218		1.45358	1.49387	1.69087	1.48495	1.46807		250		20.5257	17.399	24.2534	22.1985	24.7643		0.0821029	0.0695959	0.0970135	0.0887939	0.0990571		178		14.6143	12.3881	17.2684	15.8053	17.6322		49.1
		4. Ferulate-cis	0.6695	0.5899	0.7886	0.6631	0.6924		1.39479	1.22896	1.64292	1.38146	1.4425		0.9127	0.938	1.0617	0.9324	0.9218		1.45358	1.49387	1.69087	1.48495	1.46807		280		23.989	20.5667	24.2909	23.2577	24.5646		0.0856749	0.0734525	0.0867533	0.0830631	0.0877307		208		17.8204	15.2781	18.0447	17.2771	18.248		49.1
		5. Ferulate-cis (no TMSi)	0.644	0.6885	0.6893	0.6866	0.4612		1.34167	1.43437	1.43604	1.43042	0.960833		0.9127	0.938	1.0617	0.9324	0.9218		1.45358	1.49387	1.69087	1.48495	1.46807		208		23.0753	24.0044	21.2322	24.0819	16.3622		0.110939	0.115406	0.102078	0.115778	0.0786645		208		23.0753	24.0044	21.2322	24.0819	16.3622		49.1
		6. Ferulate-trans	2.4561	2.1429	3.0378	2.4889	2.6776		5.11688	4.46438	6.32875	5.18521	5.57833		0.9127	0.938	1.0617	0.9324	0.9218		1.45358	1.49387	1.69087	1.48495	1.46807		280		88.005	74.7116	93.5722	87.296	94.9945		0.314304	0.266827	0.334186	0.311771	0.339266		208		65.3751	55.5001	69.5107	64.8485	70.5673		49.1
		7. Caffeate	1.1499	0.9862	1.1193	1.0645	1.1856		2.6993	2.31502	2.62746	2.49883	2.7831		0.9127	0.938	1.0617	0.9324	0.9218		1.45358	1.49387	1.69087	1.48495	1.46807		338		46.4251	38.7421	38.8477	42.0692	47.3939		0.137352	0.114622	0.114934	0.124465	0.140219		194		26.6464	22.2366	22.2972	24.1462	27.2024		49.1
Fatty acid methyl esters
		8. 16:0	0.217	0.204	0.2336	0.1955	0.199		0.302102	0.284004	0.325212	0.27217	0.277043		0.6848	0.7235	0.7812	0.7108	0.6826		0.953362	1.00724	1.08757	0.989559	0.950299		270		7.92202	7.04907	7.47568	6.87606	7.28831		0.0293408	0.0261077	0.0276877	0.0254669	0.0269937		270		7.92202	7.04907	7.47568	6.87606	7.28831		49.1
		9. 18:0	0.0432	0.0398	0.0444	0.0391	0.0403		0.0596026	0.0549117	0.0612583	0.0539459	0.0556015		0.6848	0.7235	0.7812	0.7108	0.6826		0.953362	1.00724	1.08757	0.989559	0.950299		298		1.56296	1.36293	1.40815	1.36288	1.46274		0.00524483	0.00457358	0.00472533	0.00457342	0.00490852		298		1.56296	1.36293	1.40815	1.36288	1.46274		49.1
		10. 20:0	0.0298	0.0274	0.0331	0.0278	0.0281		0.0404781	0.0372181	0.0449606	0.0377615	0.038169		0.6848	0.7235	0.7812	0.7108	0.6826		0.953362	1.00724	1.08757	0.989559	0.950299		326		1.06146	0.923766	1.03351	0.953998	1.00413		0.003256	0.00283364	0.00317028	0.00292637	0.00308015		326		1.06146	0.923766	1.03351	0.953998	1.00413		49.1
		11. 22:0	0.0298	0.0274	0.0331	0.0278	0.0281		0.0399625	0.036744	0.0443878	0.0372804	0.0376827		0.6848	0.7235	0.7812	0.7108	0.6826		0.953362	1.00724	1.08757	0.989559	0.950299		354		1.04793	0.911998	1.02035	0.941844	0.991338		0.00296027	0.00257626	0.00288233	0.00266058	0.00280039		327		0.968008	0.842439	0.942523	0.870009	0.915728		49.1
		12. 24:0	0.0551	0.0518	0.0677	0.0501	0.0513		0.0730847	0.0687076	0.0897973	0.0664527	0.0680444		0.6848	0.7235	0.7812	0.7108	0.6826		0.953362	1.00724	1.08757	0.989559	0.950299		382		1.9165	1.70534	2.06418	1.67885	1.79008		0.00501701	0.00446425	0.00540361	0.00439489	0.00468607		328		1.64558	1.46427	1.77238	1.44152	1.53703		49.1
ω-Hydroxy fatty acid methyl esters
		13. 16:0 16-OH	0.0925	0.0885	0.1086	0.0945	0.0901		0.151366	0.144821	0.177712	0.154639	0.147439		0.9127	0.938	1.0617	0.9324	0.9218		1.45358	1.49387	1.69087	1.48495	1.46807		358		2.60335	2.42359	2.62752	2.60344	2.51077		0.00727192	0.0067698	0.00733944	0.00727218	0.00701331		286		2.07977	1.93616	2.09908	2.07984	2.00581		49.1
		14. 16:0 9,16-diOH	0.7669	0.7335	0.9184	0.7681	0.7443		1.2956	1.23917	1.55154	1.29762	1.25742		0.9127	0.938	1.0617	0.9324	0.9218		1.45358	1.49387	1.69087	1.48495	1.46807		446		22.2829	20.7376	22.9399	21.8463	21.4128		0.0499617	0.0464969	0.0514348	0.0489826	0.0480107		302		15.0884	14.0421	15.5333	14.7928	14.4992		49.1
		15. 18:0 18-OH	0.055	0.0515	0.0646	0.0552	0.0526		0.0842525	0.0788909	0.0989583	0.0845588	0.080576		0.9127	0.938	1.0617	0.9324	0.9218		1.45358	1.49387	1.69087	1.48495	1.46807		386		1.44906	1.32025	1.46312	1.4236	1.37214		0.00375403	0.00342033	0.00379048	0.00368808	0.00355477		314		1.17877	1.07398	1.19021	1.15806	1.1162		49.1
		16. 18:2 18-OH	0.0521	0.0522	0.0601	0.0495	0.0491		0.0793844	0.0795368	0.091574	0.0754228	0.0748133		0.9127	0.938	1.0617	0.9324	0.9218		1.45358	1.49387	1.69087	1.48495	1.46807		382		1.36533	1.33105	1.35394	1.26979	1.27401		0.00357416	0.00348444	0.00354436	0.00332405	0.00333511		310		1.10799	1.08017	1.09875	1.03046	1.03388		49.1
		17. 18:1 18-OH	0.7091	0.6352	0.7982	0.6617	0.6247		1.08045	0.96785	1.21621	1.00823	0.951851		0.9127	0.938	1.0617	0.9324	0.9218		1.45358	1.49387	1.69087	1.48495	1.46807		384		18.5826	16.197	17.982	16.9741	16.2092		0.0483923	0.0421798	0.0468281	0.0442034	0.0422116		312		15.0984	13.1601	14.6104	13.7915	13.17		49.1
		18. 18:0 9-epoxy-18-OH	0.1644	0.153	0.1993	0.1484	0.1267		0.260952	0.242857	0.316349	0.235556	0.201111		0.9127	0.938	1.0617	0.9324	0.9218		1.45358	1.49387	1.69087	1.48495	1.46807		400		4.48811	4.06423	4.6773	3.96572	3.42476		0.0112203	0.0101606	0.0116933	0.00991429	0.00856189		328		3.68025	3.33267	3.83539	3.25189	2.8083		49.1
		19. 18:0 9-methoxy-10,18-diOH*	0.0413	0.0497	0.0497	0.0333	0.0305		0.0693884	0.0835013	0.0835013	0.0559476	0.0512433		0.9127	0.938	1.0617	0.9324	0.9218		1.45358	1.49387	1.69087	1.48495	1.46807		504		1.19341	1.3974	1.23459	0.94191	0.872631		0.00236788	0.00277262	0.00244958	0.00186887	0.00173141		360		0.852436	0.998144	0.881849	0.672793	0.623308		49.1
		20. 18:0 (9)10, 18-diOH	0.1455	0.1383	0.1709	0.143	0.1408		0.238525	0.226721	0.280164	0.234426	0.23082		0.9127	0.938	1.0617	0.9324	0.9218		1.45358	1.49387	1.69087	1.48495	1.46807		474		4.10238	3.7942	4.14229	3.9467	3.93067		0.0086548	0.00800464	0.00873902	0.00832638	0.00829255		330		2.85609	2.64153	2.88388	2.7477	2.73654		49.1
		21. 18:0 9,10, 18-triOH	0.0376	0.033	0.045	0.043	0.0474		0.0653345	0.0573414	0.0781929	0.0747176	0.0823632		0.9127	0.938	1.0617	0.9324	0.9218		1.45358	1.49387	1.69087	1.48495	1.46807		563		1.12369	0.959613	1.1561	1.25792	1.40258		0.00199589	0.00170446	0.00205347	0.00223431	0.00249126		346		0.690578	0.589745	0.710499	0.77307	0.861975		49.1
		22. 18:0 9,10, 18-triOH	0.0669	0.0609	0.0715	0.0738	0.0834		0.116247	0.105821	0.12424	0.128236	0.144917		0.9127	0.938	1.0617	0.9324	0.9218		1.45358	1.49387	1.69087	1.48495	1.46807		563		1.99932	1.77092	1.83692	2.15893	2.46783		0.0035512	0.00314551	0.00326273	0.0038347	0.00438335		346		1.22871	1.08835	1.1289	1.3268	1.51664		49.1
		23. 18:1 10 (9),18-diOH	0.0588	0.0573	0.0736	0.0655	0.0602		0.102172	0.0995656	0.127889	0.113814	0.104605		0.9127	0.938	1.0617	0.9324	0.9218		1.45358	1.49387	1.69087	1.48495	1.46807		472		1.75725	1.66624	1.89087	1.91613	1.78133		0.00372299	0.00353016	0.00400608	0.00405959	0.00377401		256		0.953087	0.903722	1.02556	1.03926	0.966146		49.1
α,ω-Dicarboxylic acid dimethyl esters
		24. 16:0	0.0551	0.0583	0.0639	0.0584	0.0522		0.0901063	0.0953393	0.104497	0.0955029	0.0853639		0.9127	0.938	1.0617	0.9324	0.9218		1.27064	1.30586	1.47807	1.29806	1.28331		314		1.77285	1.82522	1.76746	1.83933	1.66297		0.00564603	0.0058128	0.00562884	0.00585774	0.00529607		314		1.77285	1.82522	1.76746	1.83933	1.66297		49.1
		25. 17:0 8-OH	0.0479	0.0518	0.0619	0.0509	0.0487		0.08303	0.0897903	0.107298	0.0882302	0.0844167		0.6848	0.7235	0.7812	0.7108	0.6826		1.09062	1.15225	1.24415	1.13203	1.08712		416		1.90328	1.94814	2.15605	1.9485	1.9413		0.00457518	0.00468304	0.00518281	0.00468389	0.00466659		344		1.57386	1.61097	1.78289	1.61126	1.60531		49.1
		26. 18:1 9-OH	0.1644	0.153	0.1993	0.1484	0.1267		0.279212	0.259851	0.338485	0.252038	0.215183		0.6848	0.7235	0.7812	0.7108	0.6826		1.09062	1.15225	1.24415	1.13203	1.08712		428		6.40031	5.63788	6.80155	5.56608	4.94849		0.014954	0.0131726	0.0158915	0.0130049	0.0115619		340		5.08436	4.47869	5.4031	4.42165	3.93105		49.1
		27. 18:3	0.0616	0.0429	0.0495	0.0425	0.046		0.0958158	0.0667289	0.0769949	0.0661067	0.0715508		0.9127	0.938	1.0617	0.9324	0.9218		1.27064	1.30586	1.47807	1.29806	1.28331		336		1.88519	1.27749	1.30228	1.27318	1.39387		0.00561068	0.00380205	0.00387585	0.00378922	0.00414844		336		1.88519	1.27749	1.30228	1.27318	1.39387		49.1
[truncated: 41 more columns]

## Sheet: Adult leaf
Adult leaf cutin
			Peak Area (PACOI)						Corrected Peak Area (CPACOI)						ISTD Peak Area (PAIS)						Corrected ISTD Peak Area (CPAIS)						MW + TMS		Constituent Mass (ug)						umol						MW - TMS		Corrected constituent mass (- TMS) [ug]						dry weight [mg]
			Adult 1	Adult 2	Adult 3	Adult 4	Adult 5		Adult 1	Adult 2	Adult 3	Adult 4	Adult 5		Adult 1	Adult 2	Adult 3	Adult 4	Adult 5		Adult 1	Adult 2	Adult 3	Adult 4	Adult 5				Adult 1	Adult 2	Adult 3	Adult 4	Adult 5		Adult 1	Adult 2	Adult 3	Adult 4	Adult 5				Adult 1	Adult 2	Adult 3	Adult 4	Adult 5		Adult 1
Hydroxycinnamic acid methyl esters
		1. Coumarate-cis	0.1014	0.1042	0.1257	0.1494	0.0909		0.238028	0.244601	0.29507	0.350704	0.21338		0.6474	0.6996	0.7025	0.7229	0.6938		1.03106	1.11419	1.11881	1.1513	1.10495		250		5.77147	5.48831	6.59341	7.61541	4.82781		0.0230859	0.0219532	0.0263736	0.0304616	0.0193113		178		4.10928	3.90768	4.69451	5.42217	3.4374		47.9
		2. Coumarate-cis (no TMSi)	1.1675	1.3199	1.43	1.5134	0.9845		2.74061	3.09836	3.35681	3.55258	2.31103		0.6474	0.6996	0.7025	0.7229	0.6938		1.03106	1.11419	1.11881	1.1513	1.10495		178		66.4515	69.5204	75.0085	77.143	52.288		0.373323	0.390564	0.421396	0.433388	0.293753		178		66.4515	69.5204	75.0085	77.143	52.288		47.9
		3. Coumarate-trans	7.5135	6.9836	8.3696	7.9351	7.6336		17.6373	16.3934	19.6469	18.627	17.9192		0.6474	0.6996	0.7025	0.7229	0.6938		1.03106	1.11419	1.11881	1.1513	1.10495		250		427.652	367.833	439.015	404.478	405.43		1.71061	1.47133	1.75606	1.61791	1.62172		178		304.488	261.897	312.579	287.988	288.666		47.9
		4. Ferulate-cis	0.8781	0.7995	1.0446	1.0895	1.079		1.82937	1.66563	2.17625	2.26979	2.24792		0.6474	0.6996	0.7025	0.7229	0.6938		1.03106	1.11419	1.11881	1.1513	1.10495		280		44.3568	37.373	48.6287	49.2877	50.86		0.158417	0.133475	0.173674	0.176027	0.181643		208		32.9508	27.7628	36.1242	36.6137	37.7817		47.9
		5. Ferulate-cis (no TMSi)	0.3293	1.8844	2.0516	0.6049	1.4388		0.686042	3.92583	4.27417	1.26021	2.9975		0.6474	0.6996	0.7025	0.7229	0.6938		1.03106	1.11419	1.11881	1.1513	1.10495		208		16.6344	88.0871	95.5071	27.3649	67.8196		0.0799733	0.423496	0.459169	0.131562	0.326056		208		16.6344	88.0871	95.5071	27.3649	67.8196		47.9
		6. Ferulate-trans	12.5965	12.1642	14.1981	13.3926	14.0721		26.2427	25.3421	29.5794	27.9013	29.3169		0.6474	0.6996	0.7025	0.7229	0.6938		1.03106	1.11419	1.11881	1.1513	1.10495		280		636.307	568.621	660.957	605.865	663.306		2.27252	2.03079	2.36056	2.1638	2.36895		208		472.685	422.404	490.997	450.071	492.742		47.9
		7. Caffeate	0.637	0.5951	0.5923	0.6892	0.7481		1.49531	1.39695	1.39038	1.61784	1.7561		0.6474	0.6996	0.7025	0.7229	0.6938		1.03106	1.11419	1.11881	1.1513	1.10495		338		36.2566	31.3445	31.0682	35.1308	39.7325		0.107268	0.0927351	0.0919178	0.103937	0.117552		194		20.81	17.9906	17.8321	20.1638	22.8051		47.9
Fatty acid methyl esters
		8. 16:0	0.2249	0.2197	0.25	0.279	0.2375		0.3131	0.305861	0.348044	0.388417	0.330642		0.9098	0.9679	0.9655	0.9954	1.0276		1.2666	1.34749	1.34415	1.38577	1.4306		270		6.17993	5.67466	6.47333	7.00723	5.77803		0.0228886	0.0210172	0.0239753	0.0259527	0.0214001		270		6.17993	5.67466	6.47333	7.00723	5.77803		47.9
		9. 18:0	0.0393	0.0412	0.0441	0.0479	0.0428		0.0542219	0.0568433	0.0608444	0.0660872	0.0590508		0.9098	0.9679	0.9655	0.9954	1.0276		1.2666	1.34749	1.34415	1.38577	1.4306		298		1.07022	1.05462	1.13165	1.19225	1.03192		0.00359135	0.00353898	0.0037975	0.00400082	0.00346283		298		1.07022	1.05462	1.13165	1.19225	1.03192		47.9
		10. 20:0	0.0488	0.0492	0.0572	0.0566	0.0507		0.0662863	0.0668297	0.0776963	0.0768813	0.0688672		0.9098	0.9679	0.9655	0.9954	1.0276		1.2666	1.34749	1.34415	1.38577	1.4306		326		1.30835	1.23989	1.44509	1.38698	1.20347		0.00401334	0.00380336	0.00443278	0.00425453	0.00369161		326		1.30835	1.23989	1.44509	1.38698	1.20347		47.9
		11. 22:0	0.0488	0.0492	0.0572	0.0566	0.0507		0.0654419	0.0659783	0.0767065	0.0759018	0.0679898		0.9098	0.9679	0.9655	0.9954	1.0276		1.2666	1.34749	1.34415	1.38577	1.4306		354		1.29168	1.2241	1.42668	1.36931	1.18813		0.00364882	0.00345791	0.00403016	0.0038681	0.00335631		327		1.19316	1.13074	1.31786	1.26487	1.09751		47.9
		12. 24:0	0.0472	0.0548	0.0601	0.0633	0.0509		0.0626061	0.0726868	0.0797167	0.0839612	0.0675138		0.9098	0.9679	0.9655	0.9954	1.0276		1.2666	1.34749	1.34415	1.38577	1.4306		382		1.23571	1.34856	1.48266	1.5147	1.17982		0.00323484	0.00353027	0.00388132	0.00396518	0.00308852		328		1.06103	1.15793	1.27307	1.30058	1.01304		47.9
ω-Hydroxy fatty acid dimethyl esters
		13. 16:0 16-OH	0.2782	0.2747	0.2965	0.3115	0.2952		0.455245	0.449517	0.485191	0.509737	0.483063		0.6474	0.6996	0.7025	0.7229	0.6938		1.03106	1.11419	1.11881	1.1513	1.10495		358		11.0383	10.0862	10.8417	11.0687	10.9295		0.0308333	0.0281737	0.030284	0.0309183	0.0305293		286		8.81832	8.05768	8.66123	8.84262	8.73139		47.9
		14. 16:0 9,16-diOH	1.156	1.1787	1.3092	1.33	1.2366		1.95294	1.99129	2.21176	2.24689	2.08911		0.6474	0.6996	0.7025	0.7229	0.6938		1.03106	1.11419	1.11881	1.1513	1.10495		446		47.3529	44.6802	49.4221	48.7905	47.2668		0.106172	0.10018	0.110812	0.109396	0.105979		302		32.0641	30.2543	33.4652	33.0375	32.0058		47.9
		15. 18:0 18-OH	0.0773	0.078	0.0886	0.0866	0.0857		0.118413	0.119485	0.135723	0.132659	0.131281		0.6474	0.6996	0.7025	0.7229	0.6938		1.03106	1.11419	1.11881	1.1513	1.10495		386		2.87116	2.68099	3.03276	2.88065	2.97028		0.00743823	0.00694557	0.00785689	0.00746282	0.00769502		314		2.33561	2.18091	2.46706	2.34332	2.41624		47.9
		16. 18:2 18-OH	0.1081	0.1088	0.2542	0.1217	0.1208		0.164711	0.165778	0.387323	0.185433	0.184062		0.6474	0.6996	0.7025	0.7229	0.6938		1.03106	1.11419	1.11881	1.1513	1.10495		382		3.99375	3.71969	8.65481	4.02662	4.16448		0.0104548	0.00973742	0.0226566	0.0105409	0.0109018		310		3.241	3.0186	7.02353	3.26767	3.37955		47.9
		17. 18:1 18-OH	4.9626	5.1921	5.7947	5.5975	5.4736		7.56148	7.91117	8.82935	8.52887	8.34009		0.6474	0.6996	0.7025	0.7229	0.6938		1.03106	1.11419	1.11881	1.1513	1.10495		384		183.343	177.509	197.293	185.201	188.698		0.477456	0.462264	0.513785	0.482295	0.491401		312		148.966	144.226	160.301	150.476	153.317		47.9
		18. 18:0 9-epoxy-18-OH	1.1954	1.2573	1.394	1.3099	1.3498		1.89746	1.99571	2.2127	2.07921	2.14254		0.6474	0.6996	0.7025	0.7229	0.6938		1.03106	1.11419	1.11881	1.1513	1.10495		400		46.0077	44.7795	49.4432	45.1492	48.4758		0.115019	0.111949	0.123608	0.112873	0.12119		328		37.7263	36.7192	40.5434	37.0223	39.7502		47.9
		19. 18:0 9-methoxy-10,18-diOH*	0.2582	0.3122	0.3566	0.2954	0.2652		0.433804	0.52453	0.599126	0.496304	0.445565		0.6474	0.6996	0.7025	0.7229	0.6938		1.03106	1.11419	1.11881	1.1513	1.10495		504		10.5184	11.7693	13.3876	10.777	10.0811		0.0208699	0.0233518	0.0265627	0.021383	0.0200021		360		7.51317	8.40664	9.56257	7.69789	7.20077		47.9
		20. 18:0 (9)10, 18-diOH	0.2117	0.2457	0.2619	0.2574	0.2398		0.347049	0.402787	0.429344	0.421967	0.393115		0.6474	0.6996	0.7025	0.7229	0.6938		1.03106	1.11419	1.11881	1.1513	1.10495		474		8.4149	9.03766	9.59378	9.16286	8.89438		0.0177529	0.0190668	0.02024	0.0193309	0.0187645		330		5.85847	6.29204	6.67922	6.37921	6.19229		47.9
		21. 18:0 9,10, 18-triOH	0.0916	0.1114	0.1383	0.129	0.1199		0.159166	0.193571	0.240313	0.224153	0.208341		0.6474	0.6996	0.7025	0.7229	0.6938		1.03106	1.11419	1.11881	1.1513	1.10495		563		3.85929	4.34331	5.36984	4.8674	4.71379		0.00685488	0.00771458	0.0095379	0.00864546	0.00837263		346		2.37179	2.66924	3.30011	2.99133	2.89693		47.9
		22. 18:0 9,10, 18-triOH	0.2	0.2689	0.3197	0.358	0.3145		0.347524	0.467246	0.555517	0.622068	0.546481		0.6474	0.6996	0.7025	0.7229	0.6938		1.03106	1.11419	1.11881	1.1513	1.10495		563		8.42641	10.484	12.4131	13.508	12.3644		0.014967	0.0186216	0.0220482	0.0239928	0.0219616		346		5.17857	6.44309	7.62868	8.30152	7.5987		47.9
		23. 18:1 10 (9),18-diOH	0.1039	0.1078	0.1348	0.1421	0.1592		0.180539	0.187315	0.234231	0.246916	0.276629		0.6474	0.6996	0.7025	0.7229	0.6938		1.03106	1.11419	1.11881	1.1513	1.10495		472		4.37752	4.20295	5.23394	5.36168	6.25884		0.0092744	0.00890455	0.0110889	0.0113595	0.0132603		256		2.37425	2.27957	2.83875	2.90803	3.39463		47.9
α,ω-Dicarboxylic acid dimethyl esters
		24. 16:0	0.0478	0.0533	0.0502	0.0531	0.05		0.0781684	0.0871627	0.0820932	0.0868357	0.0817661		0.9098	0.9679	0.9655	0.9954	1.0276		1.2666	1.34749	1.34415	1.38577	1.4306		314		1.54288	1.61713	1.52687	1.56656	1.42888		0.00491362	0.00515011	0.00486263	0.00498904	0.00455057		314		1.54288	1.61713	1.52687	1.56656	1.42888		47.9
		25. 17:0 8-OH	0.068	0.0747	0.0788	0.0756	0.072		0.117871	0.129485	0.136592	0.131045	0.124805		0.6474	0.6996	0.7025	0.7229	0.6938		1.03106	1.11419	1.11881	1.1513	1.10495		416		2.85803	2.90537	3.05218	2.8456	2.82376		0.00687025	0.00698405	0.00733697	0.00684038	0.00678789		344		2.36337	2.40251	2.52392	2.35309	2.33503		47.9
		26. 18:1 9-OH	1.1954	1.2573	1.394	1.3099	1.3498		2.03023	2.13536	2.36753	2.22469	2.29246		0.6474	0.6996	0.7025	0.7229	0.6938		1.03106	1.11419	1.11881	1.1513	1.10495		428		49.227	47.9128	52.9029	48.3084	51.8678		0.115016	0.111946	0.123605	0.11287	0.121186		340		39.1055	38.0616	42.0256	38.3758	41.2034		47.9
		27. 18:3	0.273	0.307	0.3274	0.3117	0.296		0.424638	0.477524	0.509255	0.484834	0.460414		0.9098	0.9679	0.9655	0.9954	1.0276		1.2666	1.34749	1.34415	1.38577	1.4306		336		8.38145	8.85952	9.47172	8.74665	8.04582		0.0249448	0.0263676	0.0281896	0.0260317	0.0239459		336		8.38145	8.85952	9.47172	8.74665	8.04582		47.9
		Total (excludng HCA)
[truncated: 41 more columns]

## Sheet: Graph
			nanomol/dm2													Standard Error
				sd	se		sd	se
Hydroxycinnamic acid methyl esters			Juvenile	0	0	Adult	0	0
		Coumarate	257.847	41.4482	18.5362	4071.42	314.306	140.562
		Ferulate	885.225	91.4484	40.897	5361.6	615.447	275.236
		Caffeate	223.428	25.2477	11.2911	204.75	21.153	9.45992
Fatty acid methyl esters			0	0	0	0	0	0
		18:0	8.48836	0.506545	0.226534	7.33653	0.490403	0.219315
		20:0	5.39171	0.267856	0.119789	8.05184	0.580378	0.259553
		22:0	4.90199	0.243527	0.108909	7.32051	0.527664	0.235978
		24:0	8.45792	0.590714	0.264175	7.06079	0.791163	0.353819
ω-Hydroxy fatty acid dimethyl esters			0	0	0	0	0	0
		16:0 16-OH	12.5987	0.35632	0.159351	60.1347	3.0942	1.38377
		16:0 9,16-diOH	86.4882	2.32286	1.03881	212.393	9.63719	4.30988
		18:0 18-OH	6.42995	0.182573	0.081649	14.9108	0.642313	0.287251
		18:2 18-OH	6.09697	0.144214	0.0644947	25.3814	9.74467	4.35795
		18:1 18-OH	78.983	2.59571	1.16084	968.364	52.2033	23.346
		18:0 9-epoxy-18-OH	22.1068	2.29142	1.02476	278.17	21.1987	9.48033
		18:0 (9)10, 18-diOH	14.8406	0.390816	0.174778	37.9982	2.99841	1.34093
		18:0 9,10, 18-triOH	10.1523	1.67077	0.747191	56.6706	7.07068	3.1621
		18:1 10 (9),18-diOH	6.74534	0.38644	0.172821	21.3693	2.46792	1.10369
α,ω-Dicarboxylic acid dimethyl esters			0	0	0	0	0	0
		16:0	9.97677	0.381386	0.170561	9.79787	1.14037	0.509987
		17:0 8-OH	8.40481	0.40832	0.182606	13.9172	1.17819	0.526902
		18:1 9-OH	24.1609	2.23548	0.999737	233.319	14.8801	6.65459
		18:3	7.48611	1.24619	0.557312	51.7516	5.15908	2.30721
		Total cutin monomers	321.71	16.2211	7.25432	2013.95	133.805	59.8393
		Juvenile	321.71	16.2211
		Adult	2013.95	133.805
